# Supplementary material
Source: MDPI journal article supplement (https://www.mdpi.com/2071-1050/14/4/2175)
Supplement: s1 [file s1]

## **Supporting Material:**

# **Variability of Potential Soil Nitrogen Cycling Rates in Stormwater Bioretention Facilities**

Erin N. Rivers <sup>1,\*</sup> and Jennifer L. Morse <sup>2</sup>

<sup>1</sup> Department of Watershed Sciences, Utah State University, Logan, UT 84322; erin.rivers@usu.edu

<sup>2</sup> Department of Environmental Science and Management, Portland State University, Portland, OR 97201; jlmorse@pdx.edu

\* Correspondence: erin.rivers@usu.edu

This document is 2 pages and includes 1 supplemental table.

**Table S1.** Bioretention facility locations and site photos.

| Site | Type           | Address and Coordinates                                                                     | Site Photograph                                                                       |
|------|----------------|---------------------------------------------------------------------------------------------|---------------------------------------------------------------------------------------|
| N-3  | Curb extension | N Killingsworth St & N Maryland Ave, Portland, OR 97217<br>45°33'45.4212"N, 122°40'51.168"W |    |
| NE-1 | Curb extension | NE Siskiyou St & NE 35th Pl, Portland, OR 97212<br>45°32'43.116"N, 122°37'38.7408"W         |    |
| SE-2 | Curb extension | SE Belmont St & SE 42nd Ave, Portland, OR 97214<br>45°30'59.832"N, 122°37'9.5628"W          |    |
| SW-2 | Curb extension | SW Florida St & SW Virginia Ave, Portland, OR 97219<br>45°28'29.9748"N, 122°40'26.2632"W    |    |
| N-2  | Planter        | N Schofield St & N Denver Ave, Portland OR 97217<br>45°34'54.5664"N, 122°41'13.1064"W       |   |
| SW-1 | Planter        | SW Mill St & SW 12th Ave, Portland, OR 97201<br>45°30'49.5216"N, 122°41'15.8064"W           |  |
| N-1  | Swale          | N Willamette Blvd & N Denver Ave, Portland, OR 97217<br>45°33'42.8976"N, 122°52'3.0792"W    |  |
| NE-2 | Swale          | NE Fremont St & NE Alameda St, Portland, OR 97212<br>45°32'54.4452"N, 122°37'29.3232"W      |  |
| SE-1 | Swale          | SE Clay St & SE 45th Ave, Portland, OR 97215<br>45°30'40.4388"N, 122°36'57.528"W            |  |
